# Supplementary material for: Quasiclassical trajectory calculations of hydrogen absorption in the (NaAlH4)2Ti system on a model analytical potential energy surface
Source: Royal Society of Chemistry journal article supplement (doi:10.1039/c2cp23689c), 2012-01-01
Supplement: c2cp23689c.pdf [file c2cp23689c.pdf]

## Electronic Supplementary Information

### Quasiclassical Trajectory Calculations of Hydrogen Absorption in the $(\text{NaAlH}_4)_2\text{Ti}$ System on a Model Analytical Potential Energy Surface

by Ivan Ljubić and David C. Clary

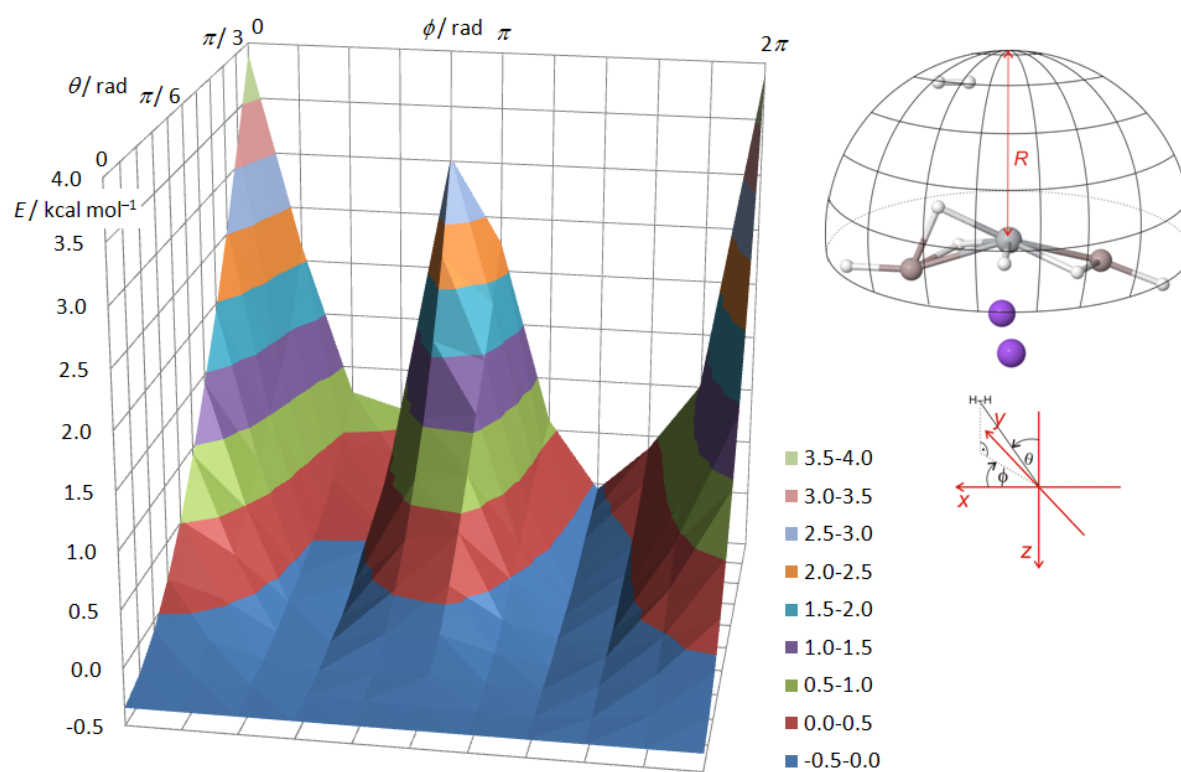

**Figure S1.** 3D surface plot of the B97-2/6-311++G(2d,p) potential corresponding to the  $\text{H}_2$  centre of mass located on the radial grid ( $R = 4 \text{ \AA}$ ). The  $\text{H}_2$  molecule is kept parallel to the  $x$ -axis ( $d(\text{H}_2) = 0.74 \text{ \AA}$ ). The zero reference energy corresponds to the  $\text{H}_2$  far away from the cluster in the equilibrium geometry.

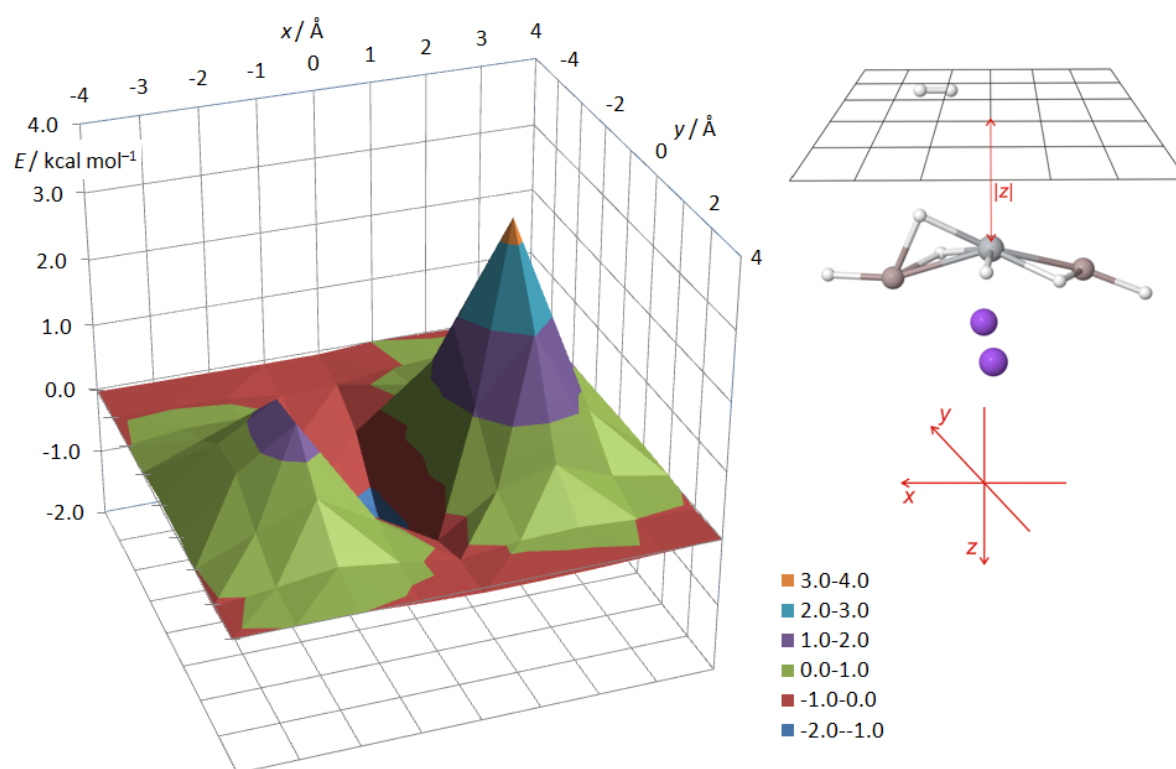

**Figure S2.** 3D surface plot of the B97-2/6-311++G(2d,p) potential corresponding to the  $\text{H}_2$  centre of mass located on the planar grid ( $|z| = 3 \text{\AA}$ ). The  $\text{H}_2$  molecule is kept parallel to the  $x$ -axis ( $d(\text{H}_2) = 0.74 \text{\AA}$ ). The zero reference energy corresponds to the  $\text{H}_2$  far away from the cluster in the equilibrium geometry.
